# Supplementary material for: Characterization of the Virulence and Yield Impact of Fusarium Species on Canola (Brassica napus)
Source: MDPI journal article supplement (doi:10.3390/plants12173020), 2023-08-22
Supplement: s1 [file s1]

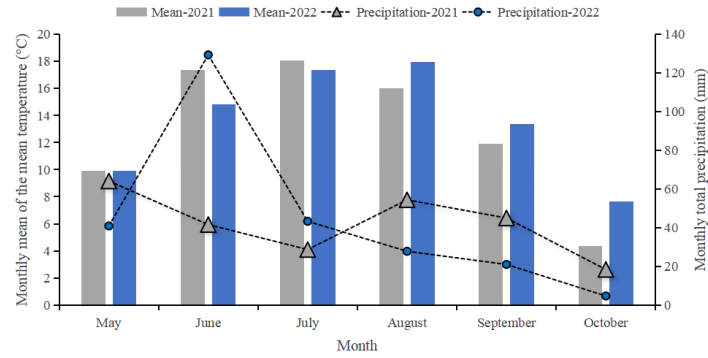

**Figure S1.** Precipitations and mean temperatures at the site used in field trials, St. Albert, AB, 2021-2022.

**Table S1.** Extreme high temperature (>30°C) at the St. Albert research station in field trials, 2021-2022

| Date       | Max Temp (°C) | Date       | Max Temp (°C) |
|------------|---------------|------------|---------------|
| 26-06-2021 | 30.8          | 28-07-2022 | 31.7          |
| 27-06-2021 | 30.7          | 13-08-2022 | 30.7          |
| 28-06-2021 | 35.2          | 19-08-2022 | 32.5          |
| 29-06-2021 | 35.2          | 20-08-2022 | 31            |
| 30-06-2021 | 35.9          | 26-08-2022 | 30.1          |
| 01-07-2021 | 34.3          | 30-08-2022 | 30.9          |
| 08-07-2021 | 31.4          | 31-08-2022 | 31.8          |
| 09-07-2021 | 32            | 02-09-2022 | 31.4          |
| 10-07-2021 | 32.5          | 03-09-2022 | 33.7          |
| 14-07-2021 | 30.8          | 04-09-2022 | 31.6          |
| 31-07-2021 | 30.1          |            |               |
| 05-08-2021 | 31.1          |            |               |
| 13-08-2021 | 32.2          |            |               |
| 14-08-2021 | 32.3          |            |               |
